# Supplementary material for: The Small Protein YmoA Controls the Csr System and Adjusts Expression of Virulence-Relevant Traits of Yersinia pseudotuberculosis
Source: Front Microbiol. 2021 Aug 3;12:706934. doi: 10.3389/fmicb.2021.706934 (PMC8369931; doi:10.3389/fmicb.2021.706934)
Supplement: Supplementary file 12 [file Table_4.XLSX]

## Sheet: Category wt vs ymoA
Supplementary Material
Table S4: Classification of YmoA-dependent genes
Gene ID	Gene locus	Fold change	Description	Category - class	new_locus_tag	gene_name	product
Virulence genes
Downregulated loci (YmoA-activated)
YPK_0281	bfr	-2.5	bacterioferritin, persistence	virulence factor	YPK_RS01375	YPK_RS01375	bacterioferritin
YPK_1268	ail	-2	virulence-related outer membrane protein	virulence factor	YPK_RS06400	ail	attachment invasion locus protein Ail
YPK_1876	rovA	-2.5	virulence regulator, induces invasin	virulence regulation	YPK_RS09435	rovA	virulence master transcriptional regulator RovA
YPK_3214	ymoA	-2	modulator of virulence, toxin blocked by YmoB(YbaJ)	virulence regulation	YPK_RS16100	YPK_RS16100	expression modulating protein YmoA
YPK_3289	crl	-2.5	DNA transcriptional regulator, adhesion; sigma factor-binding protein	virulence regulation	YPK_RS16495	YPK_RS16495	sigma factor-binding protein Crl
Upregulated loci (YmoA-repressed)
pYV0001	ypkA/yopO	2.7	effector protein, kinase	virulence factor, pYV
pYV0002	sycO	3.8	effector chaperone, increases solubility of YpkA/YopO	virulence factor, pYV
pYV0024	sycE, yerA	3.7	effector chaperone, increases solubility of YopE	virulence factor, pYV
pYV0025	yopE	8.4	effector protein, GEF mimic, immune defense	virulence factor, pYV
pYV0040	yopK/yopQ	6	effector protein, immune defense	virulence factor, pYV
pYV0047	yopM	4	effector protein, leucine rich repeat protein	virulence factor, pYV
pYV0049		4.1	similarity with autotransporter proteins	virulence factor, pYV
pYV0054	yopD	4.9	effector protein, translocator protein	virulence factor, pYV
pYV0055	yopB	5.7	effector protein, translocator protein	virulence factor, pYV
pYV0056	lcrH, sycD	5.9	effector chaperone	virulence factor, pYV
pYV0057	lcrV	9	V antigen, antihost protein, immune defense	virulence factor, pYV
pYV0058	lcrG	7.5	type III secretion system, immune defense	virulence factor, pYV
pYV0059	lcrR	3.8	type III secretion system, regulator	virulence factor, pYV
pYV0061	yscY, lcrD	2.4	type III ecretion system, immune defense	virulence factor, pYV
pYV0062	yscX	2.2	type III secretion system, immune defense	virulence factor, pYV
pYV0063	sycN	2.1	effector chaperone, YopN chaperone	virulence factor, pYV
pYV0064	tyeA	2.2	Yop secretion and targeting protein, regulator	virulence factor, pYV
pYV0065	yopN, lcrE	3.3	type III secretion system, secretion control	virulence factor, pYV
pYV0066		3.9	putative Yops secretion ATP synthase	virulence factor, pYV
pYV0068	yscO	2.9	type III secretion system, immune defense	virulence factor, pYV
pYV0069	yscP	2.5	type III secretion system, immune defense	virulence factor, pYV
pYV0070	yscQ	2.2	type III secretion system, immune defense	virulence factor, pYV
pYV0071	yscR	2	type III secretion system, immune defense	virulence factor, pYV
pYV0074	yscU	2	type III secretion system, immune defense	virulence factor, pYV
pYV0075	virG, yscW	7.3	putative Yop targeting lipoprotein	virulence factor, pYV
pYV0076	lcrF, virF	5.5	thermoregulatory virulence regulator protein	virulence factor, pYV
pYV0077	yscA	9.6	type III secretion system, immune defense	virulence factor, pYV
pYV0078	yscB	9	type III secretion system, chaperone, immune defense	virulence factor, pYV
pYV0079	yscC	5.5	type III secretion system, immune defense	virulence factor, pYV
pYV0080	yscD	4.6	type III secretion system, immune defense	virulence factor, pYV
pYV0081	yscE	8.1	type III secretion system, immune defense	virulence factor, pYV
pYV0082	yscF	8.5	type III secretion system, immune defense	virulence factor, pYV
pYV0083	yscG	5.3	type III secretion system, immune defense	virulence factor, pYV
pYV0084	yscH,lcrP	3.8	type III secretion system, immune defense	virulence factor, pYV
pYV0085	yscI, lcrO	5	type III secretion system, immune defense	virulence factor, pYV
pYV0086	yscJ, ylpB	4.2	type III secretion system, immune defense	virulence factor, pYV
pYV0087	yscK	3.9	type III secretion system, immune defense	virulence factor, pYV
pYV0088	yscL	5	type III secretion system, immune defense	virulence factor, pYV
pYV0089	yscM, lcrQ	3.9	type III secretion system, regulatory protein	virulence factor, pYV
pYV0094	yopH	5.9	effector protein, protein-tyrosine phosphatase	virulence factor, pYV
pYV0098	yopP, yopJ	14.8	effector protein, protease family, immune defense	virulence factor, pYV
YPK_0051	yqiL	6.3	fimbrial protein, colonization factor	virulence factor	YPK_RS00240	YPK_RS00240	fimbrial protein
YPK_0053	ybgP	2.4	pili assembly protein	virulence factor	YPK_RS00250	YPK_RS00250	molecular chaperone
YPK_0386	impB1, tssB	2.8	type VI secretion system	virulence factor	YPK_RS01935	tssB	type VI secretion system contractile sheath small subunit
YPK_0387	impC1, tssC	2.4	type VI secretion system	virulence factor	YPK_RS01940	tssC	type VI secretion system contractile sheath large subunit
YPK_0479	tcaB	2.8	insecticidal toxin subunit	defense	YPK_RS02390	YPK_RS02390	phage tail tape measure protein
YPK_0480	tcaA	2.7	insecticidal toxin subunit	defense	YPK_RS02395	YPK_RS02395	toxin
YPK_0694	smfA1	2.7	fimbrial protein, colonization factor	virulence factor	YPK_RS03495	YPK_RS03495	type 1 fimbrial protein
YPK_0792	yspI/ytbI	2.6	autoinducer synthesis protein		YPK_RS03970	YPK_RS03970	acyl-homoserine-lactone synthase
YPK_0871	yadF, yadN	2	putative adhesin	virulence factor	YPK_RS04365	yapN	autotransporter adhesin YapN
YPK_1304	hcp1	3.5	Hcp1 family type VI secretion system effector	virulence factor	YPK_RS06585	hcp	Hcp family type VI secretion system effector
YPK_1449	csgG	4.5	curli production assembly, colonization factor	virulence factor	YPK_RS07315	YPK_RS07315	CsgG/HfaB family protein
YPK_1450		3.7	putative lipoprotein	virulence factor	YPK_RS07320	YPK_RS07320	DUF4810 domain-containing protein
YPK_1475	fimA1	3.4	fimbrial protein, colonization factor	virulence factor	YPK_RS07440	YPK_RS07440	type 1 fimbrial protein
YPK_1479	impB3, tssB2	2.2	type VI secretion system	virulence factor	YPK_RS07465	tssB	type VI secretion system contractile sheath small subunit
YPK_1480	impC, tssC2	2.5	type VI secretion system, EvpB family	virulence factor	YPK_RS07470	tssC	type VI secretion system contractile sheath large subunit
YPK_1481	hcp2	5.7	Hcp1 family type VI secretion system effector, Hcp	virulence factor	YPK_RS07475	hcp	type VI secretion system tube protein Hcp
YPK_1522	smfA2	2.6	fimbrial protein, colonization factor	virulence factor	YPK_RS07680	YPK_RS07680	type 1 fimbrial protein
YPK_1644	cas1f	2.1	CRISPR-associated Cas1 family protein	defense, immunity	YPK_RS08290	cas1f	type I-F CRISPR-associated endonuclease Cas1
YPK_1786	fimA2	3.7	fimbrial protein, colonization factor	virulence factor	YPK_RS08970	YPK_RS08970	type 1 fimbrial protein
YPK_1953	srfB	2	putative virulence factor	virulence factor	YPK_RS09830	YPK_RS09830	virulence factor SrfB
YPK_2061	ailB	2	Ail-type outer membrane proteine, put. virulence factor	virulence factor	YPK_RS10355	YPK_RS10355	Ail/Lom family outer membrane beta-barrel protein
YPK_2615	cnfY	9.6	cytotoxic necrotizing factor, bacterial toxin	virulence factor	YPK_RS13075	cnfy	cytotoxic necrotizing factor CNFY
YPK_2672	yadC	2.1	putative adhesin	virulence factor	YPK_RS13375	YPK_RS13375	YadA-like family protein
YPK_2759	psaA	2.7	pH6 antigen, adhesin, colonization factor	virulence factor	YPK_RS13800	psaA	adhesin PsaA
YPK_2760	psaF	2.1	regulator of psaABC operon	virulence factor	YPK_RS13805	YPK_RS13805	protein PsaF
YPK_3060	hcp3	6	Hcp1 family type VI secretion system effector	virulence factor	YPK_RS15330	hcp	Hcp family type VI secretion system effector
YPK_3177	wzz, fepE	3.8	chain length determinant protein, LPS/O-antigen	defense, persistence	YPK_RS15920	fepE	LPS O-antigen length regulator
YPK_3178	manB, cpsG	3.1	phosphomannomutase, LPS/O-antigen	defense, persistence	YPK_RS15925	cpsG	phosphomannomutase CpsG
YPK_3179	gne	3.4	NAD-dependent epimerase/hydratase, LPS/O-antigen	defense, persistence	YPK_RS15930	YPK_RS15930	NAD-dependent epimerase/dehydratase family protein
YPK_3180	wbyL	3.4	glycosyl transferase family protein, LPS/O-antigen	defense, persistence	YPK_RS15935	YPK_RS15935	glycosyltransferase
YPK_3181	manC	2.7	mannose-1-phosphate guanyltransferase/mannose-6-phosphate isomerase, LPS/O-antigen	defense, persistence	YPK_RS15940	YPK_RS15940	mannose-1-phosphate guanylyltransferase/mannose-6-phosphate isomerase
YPK_3182	fcl	2.4	NAD-dependent epimerase/dehydratase; GDP-L-fucose synthetease, LPS/O-antigen	defense, persistence	YPK_RS15945	YPK_RS15945	GDP-L-fucose synthase
YPK_3183	gmd	2.3	GDP-mannose 4,6,-dehydratase, LPS/O-antigen	defense, persistence	YPK_RS15950	gmd	GDP-mannose 4%2C6-dehydratase
YPK_3184	wbyK	2.3	mannoslytransferase, LPS/O-antigen	defense, persistence	YPK_RS15955	YPK_RS15955	glycosyltransferase family 4 protein
YPK_3213	ymoB(ybaJ)	9	anti-toxin of YmoA	virulence regulation	YPK_RS16095	tomB	Hha toxicity modulator TomB
YPK_3564	impC2, tssC3	2.4	type VI secretion system, EvpB family	virulence factor	YPK_RS17910	tssC	type VI secretion system contractile sheath large subunit
YPK_3565	impB2, tssB3	2.4	type VI secretion system	virulence factor	YPK_RS17915	tssB	type VI secretion system contractile sheath small subunit
YPK_3566	impA	2.5	type VI secretion system	virulence factor	YPK_RS17920	YPK_RS17920	ImpA family type VI secretion system protein
YPK_3649	lsrR	2.1	transcriptional repressor		YPK_RS18345	lsrR	transcriptional regulator LsrR
YPK_3654	lsrF	2.2	autoinducer-2 (AI-2) modifying/degrading protein LsrF		YPK_RS18375	lsrF	3-hydroxy-5-phosphonooxypentane-2%2C4-dione thiolase
YPK_3655	lsrG	2.2	autoinducer-2 (AI-2) modifying protein LsrG		YPK_RS18380	lsrG	(4S)-4-hydroxy-5-phosphonooxypentane-2%2C3-dione isomerase
YPK_3870	fimD1	2	fimbrial biogenesis outer membrane usher protein	virulence factor	YPK_RS19470	YPK_RS19470	fimbrial biogenesis outer membrane usher protein
YPK_4042	fimA3	2.1	fimbrial protein, colonization factor	virulence factor	YPK_RS20370	YPK_RS20370	type 1 fimbrial protein
YPK_4085	hasA	8.2	heme-binding protein, heme acquisition, persistence	virulence factor	YPK_RS20615	YPK_RS20615	heme acquisition protein HasA
Motility
Downregulated loci (YmoA-activated)
YPK_2381	fliC	-2	flagellin	cell motility, flagellar assembly	YPK_RS11905	YPK_RS11905	FliC/FljB family flagellin
Upregulated loci (YmoA-repressed)
YPK_1745	flhD	2.9	transcriptional activator for flagellar/motility genes	cell motility, flagellar assembly	YPK_RS08785	flhD	flagellar transcriptional regulator FlhD
YPK_1746	flhC	2.2	transcriptional activator for flagellar/motility genes	cell motility, flagellar assembly	YPK_RS08790	flhC	flagellar transcriptional regulator FlhC
YPK_2378	fliZ	2.3	flagellar biosynthesis protein	cell motility, flagellar assembly	YPK_RS11895	fliZ	flagella biosynthesis regulatory protein FliZ
YPK_2384	fliT	2.6	flagellar protein	cell motility, flagellar assembly	YPK_RS11920	fliT	flagella biosynthesis regulatory protein FliT
YPK_2390	fliE	2.5	hook basal body protein	cell motility, flagellar assembly	YPK_RS11955	fliE	flagellar hook-basal body complex protein FliE
YPK_2391	fliF	2	flagellar MS-ring protein	cell motility, flagellar assembly	YPK_RS11960	fliF	flagellar M-ring protein FliF
YPK_2423	flgD	2.5	flagellar basal body rod modification protein	cell motility, flagellar assembly	YPK_RS12105	flgD	flagellar hook assembly protein FlgD
YPK_2424	flgC	2.1	flagellar basal body rod protein	cell motility, flagellar assembly	YPK_RS12110	flgC	flagellar basal body rod protein FlgC
YPK_2425	flgB	2.1	flagellar basal body rod protein	cell motility, flagellar assembly	YPK_RS12115	flgB	flagellar basal body rod protein FlgB
Stress adaptation
Downregulated loci (YmoA-activated)
YPK_0120	uspA	-2	universal stress protein	stress response	YPK_RS00580	uspA	universal stress protein UspA
YPK_1140	hdeB	-3.3	acid-resistance protein	stress response, acid resistance	YPK_RS05755	hdeB	acid-activated periplasmic chaperone HdeB
YPK_1602	dps	-2	DNA starvation/stationary phase protection	stress response, starvation	YPK_RS08095	dps	DNA starvation/stationary phase protection protein Dps
YPK_2017	cstA	-2	carbon starvation protein	stress response, starvation	YPK_RS10135	YPK_RS10135	carbon starvation protein A
YPK_2694	cspD	-3.3	cold shock protein, DNA binding protein	stress response	YPK_RS13485	cspD	cold shock-like protein CspD
YPK_2855	katA	-2	catalase	stress response, oxidative stress	YPK_RS14285	YPK_RS14285	catalase
YPK_2879	glsB/yeaQ/ymgE	-2	hypothetical protein	stress response	YPK_RS14405	YPK_RS14405	GlsB/YeaQ/YmgE family stress response membrane protein
YPK_3388	katG	-2	catalase/peroxidase	stress response, oxidative stress	YPK_RS17025	katG	catalase/peroxidase HPI
YPK_3445	sodC	-2.5	superoxide dismutase	stress response, oxidative stress	YPK_RS17310	YPK_RS17310	superoxide dismutase family protein
YPK_3632	osmY	-2	transport-associated	osmotic stress	YPK_RS18240	osmY	molecular chaperone OsmY
Upregulated loci (YmoA-repressed)
YPK_0011	ibpA	8	heat shock chaperone	stress response, heat shock	YPK_RS00055	YPK_RS00055	heat shock chaperone IbpA
YPK_0012	ibpB	5.4	heat shock chaperone	stress response, heat shock	YPK_RS00060	ibpB	heat shock chaperone IbpB
YPK_0442	cspA1	3.1	cold shock regulator protein, CspA family	stress response, regulator	YPK_RS02200	cspA	RNA chaperone/antiterminator CspA
YPK_0443	cspA2	2.7	cold shock regulator protein, CspA family	stress response, regulator	YPK_RS02205	cspA	cold-shock protein
YPK_0444	cspA3	2.1	cold shock regulator protein, CspA family	stress response, regulator	YPK_RS02210	cspA	cold-shock protein
YPK_1740	cspE	4.2	cold shock regulator protein	stress response, regulator	YPK_RS08755	cspE	transcription antiterminator/RNA stability regulator CspE
YPK_2974	grpE	2.7	heat shock chaperone	stress response, heat shock	YPK_RS14900	grpE	nucleotide exchange factor GrpE
YPK_3195	htpG	2.6	heat shock chaperone, Hsp90	stress response, heat shock	YPK_RS16010	htpG	molecular chaperone HtpG
YPK_3349	clpB	2.4	protein assembly disaggregation chaperone	stress response	YPK_RS16820	clpB	ATP-dependent chaperone ClpB
YPK_3593	dnaJ	2.9	heat shock chaperone	stress response, heat shock	YPK_RS18060	dnaJ	molecular chaperone DnaJ
YPK_3594	dnaK	3.2	heat shock chaperone, assist RNA degradation	stress response, heat shock	YPK_RS18065	dnaK	molecular chaperone DnaK
YPK_4103	hslV	2.9	ATP dependent protease subunit	stress response	YPK_RS20715	hslV	ATP-dependent protease subunit HslV
YPK_4104	hslU	2.4	ATP dependent protease subunit	stress response	YPK_RS20720	hslU	HslU--HslV peptidase ATPase subunit
Genetic information processing
Downregulated loci (YmoA-activated)
YPK_0348	rsd	-2	regulator of sigma 70/RpoD	transcription	YPK_RS01740	YPK_RS01740	sigma D regulator
YPK_0504	yhbH	-2.5	putative sigma 54 modulation protein	transcription	YPK_RS02515	YPK_RS02515	ribosome hibernation promoting factor
YPK_1826	ihfA	-2	integration host factor	transcription	YPK_RS09175	ihfA	integration host factor subunit alpha
YPK_3425	rpoS	-2	RNA polymerase sigma factor	transcription	YPK_RS17205	rpoS	RNA polymerase sigma factor RpoS
Upregulated loci (YmoA-repressed)
YPK_0282	rpsJ	2.4	small subunit ribosomal protein S10	translation	YPK_RS01380	rpsJ	30S ribosomal protein S10
YPK_0283	rplC	2	large subunit ribosomal protein L3	translation	YPK_RS01385	rplC	50S ribosomal protein L3
YPK_0285	rplW	2	large subunit ribosomal protein L23	translation	YPK_RS01395	rplW	50S ribosomal protein L23
YPK_0286	rplB	2	large subunit ribosomal protein L2	translation	YPK_RS01400	rplB	50S ribosomal protein L2
YPK_0287	rpsS	2	small subunit ribosomal protein S19	translation	YPK_RS01405	rpsS	30S ribosomal protein S19
YPK_0288	rplV	2.1	large subunit ribosomal protein L22	translation	YPK_RS01410	rplV	50S ribosomal protein L22
YPK_0289	rpsC	2.2	small subunit ribosomal protein S3	translation	YPK_RS01415	rpsC	30S ribosomal protein S3
YPK_0291	rpmC	2.4	large subunit ribosomal protein L29	translation	YPK_RS01425	rpmC	50S ribosomal protein L29
YPK_0309	rplQ	2.3	large subunit ribosomal protein L17	translation	YPK_RS01515	rplQ	50S ribosomal protein L17
YPK_0524	rplM	2	large subunit ribosomal protein L13	translation	YPK_RS02610	rplM	50S ribosomal protein L13
YPK_0604		2.1	endoribonuclease L-PSP	RNA processing	YPK_RS03045	YPK_RS03045	RidA family protein
YPK_0636	rpsU	2.3	small subunit ribosomal protein S21	translation	YPK_RS03215	rpsU	30S ribosomal protein S21
YPK_0725		2.8	putative transcription factor, CadC	transcription	YPK_RS03645	YPK_RS03645	transcriptional regulator
YPK_2385		2.2	AraC family transcription factor	transcription	YPK_RS11930	YPK_RS11930	helix-turn-helix transcriptional regulator
YPK_2843	rcsB	2	two component system, capsular synthesis response regulator	transcription	YPK_RS14225	rcsB	transcriptional regulator RcsB
YPK_3590	rpsT	2.2	small subunit ribosomal protein S20	translation	YPK_RS18045	rpsT	30S ribosomal protein S20
YPK_3737	rrmJ	2	23S rRNA methyltransferase, ribosomal RNA large subunit methyltransferase E	translation	YPK_RS18805	rlmE	23S rRNA (uridine(2552)-2'-O)-methyltransferase RlmE
YPK_3756	rpmA	2.2	large subunit ribosomal protein L27	translation	YPK_RS18900	rpmA	50S ribosomal protein L27
YPK_3757	rplU	2.1	large subunit ribosomal protein L21	translation	YPK_RS18905	rplU	50S ribosomal protein L21
YPK_3781	rplI	2	large subunit ribosomal protein L9	translation	YPK_RS19025	rplI	50S ribosomal protein L9
YPK_3782	rpsR	2.3	small subunit ribosomal protein S18	translation	YPK_RS19030	rpsR	30S ribosomal protein S18
YPK_4154	rpmB	2.1	large subunit ribosomal protein L28	translation	YPK_RS20970	rpmB	50S ribosomal protein L28
Metabolism
Downregulated loci (YmoA-activated)
YPK_0077	hutH	-2	histidine ammonia-lyase	N metabolism	YPK_RS00370	hutH	histidine ammonia-lyase
YPK_0356	purD	-2	phosphoribosylamine glycine ligase	nucleotide/purine metabolism	YPK_RS01780	purD	phosphoribosylamine--glycine ligase
YPK_1001	cynT	-3.3	carbonic anhydrase	N metabolism	YPK_RS05030	YPK_RS05030	twin-arginine translocation signal domain-containing protein
YPK_1265	glyA	-2	glycine, serine, threonine metabolism	aa metabolism	YPK_RS06390	YPK_RS06390	serine hydroxymethyltransferase
YPK_1302	guaB	-2	inosine-5'-monophosphate dehydrogenase	nucleotide/purine metabolism	YPK_RS06570	guaB	IMP dehydrogenase
YPK_1351	purI	-2	phosphoribosylaminoimidazole synthetase	nucleotide/purine metabolism	YPK_RS06800	purM	phosphoribosylformylglycinamidine cyclo-ligase
YPK_1534	cvpA	-2	colicin production protein, holin	nucleotide/purine metabolism	YPK_RS07740	cvpA	colicin V production protein
YPK_1846	ydiI	-2	thioesterase superfamily protein	metabolism	YPK_RS09275	YPK_RS09275	hotdog fold thioesterase
YPK_1883	gstA	-2.5	glutathionine S-transferase	aa metabolism, transport	YPK_RS09470	gstA	glutathione transferase GstA
YPK_1983	tpx	-2	thiol peroxidase	metabolism	YPK_RS09970	YPK_RS09970	MFS transporter
YPK_2229	astC	-2	bifunctional succinylornithine transaminase/acetyl-ornithine aminotransferase	aa metabolism	YPK_RS11155	astC	aspartate aminotransferase family protein
YPK_2363	wrbA	-2.5	TrpR repressor binding protein	metabolism, regulation	YPK_RS11830	wrbA	NAD(P)H:quinone oxidoreductase
YPK_2447	purT	-2	phosphoribosylglycinamide formyltransferase 2	nucleotide/purine metabolism	YPK_RS12230	purT	formate-dependent phosphoribosylglycinamide formyltransferase
YPK_2465	manY	-2	PTS system, mannose-specific IIC component	C metabolism, transport	YPK_RS12320	YPK_RS12320	PTS mannose/fructose/sorbose transporter subunit IIC
YPK_2466	manZ	-2	PTS system, mannose-specific IID component	C metabolism, transport	YPK_RS12325	manZ	PTS mannose transporter subunit IID
YPK_3010	gltI	-5	glutamate and aspartate transport subunit substrate binding protein	aa metabolism, transport	YPK_RS15095	YPK_RS15095	amino acid ABC transporter substrate-binding protein
YPK_3219	amtB	-5	ammonium transporter	N metabolism	YPK_RS16120	amtB	ammonium transporter AmtB
YPK_3220	glnK	-5	nitrogen regulator protein P-II	N metabolism	YPK_RS16125	glnK	P-II family nitrogen regulator
YPK_3281	yaiE, ppnP	-2	pyrimidine/purine nucleoside phosphorylase	metabolism	YPK_RS16445	ppnP	pyrimidine/purine nucleoside phosphorylase
YPK_3582	carB	-2	carbamoyl-phosphate synthase, large subunit	nucleotide/pyrimidine metabolism	YPK_RS18000	carB	carbamoyl-phosphate synthase large subunit
YPK_3848	fucO	-2	lactaldehyde reductase	metabolism	YPK_RS19355	fucO	lactaldehyde reductase
YPK_3923	actP	-2	acetate permease, Na+ symporter	C metabolism, transport	YPK_RS19735	actP	cation/acetate symporter ActP
YPK_3950	udp	-2	uridine phosphorylase	nucleotide/pyrimidine metabolism	YPK_RS19890	YPK_RS19890	uridine phosphorylase
YPK_4189	glnA	-5	glutamine synthase	N metabolism, assimilation	YPK_RS21145	YPK_RS21145	glutamate--ammonia ligase
YPK_4190	glnL	-2	nitrogen regulation protein NRII, histidine sensor kinase	N metabolism, assimilation	YPK_RS21150	YPK_RS21150	nitrogen regulation protein NR(II)
YPK_4191	glnG	-2	nitrogen regulation protein NRI, response regulator	N metabolism, assimilation	YPK_RS21155	YPK_RS21155	nitrogen regulation protein NR(I)
YPK_4214	asnA	-2	aspartate-ammonia ligase	N metabolism	YPK_RS21280	YPK_RS21280	aspartate--ammonia ligase
Upregulated loci (YmoA-repressed)
YPK_0062		2.1	hypothetical protein		YPK_RS00295	YPK_RS00295	SAM-dependent methyltransferase
YPK_0378	malE	4	maltose ABC transporter periplasmic protein	C metabolism, transport	YPK_RS01900	malE	maltose/maltodextrin ABC transporter substrate-binding protein MalE
YPK_0379	amyA	4.1	glycosidase	C metabolism, transport	NA	NA	NA
YPK_0380	malK	4.7	maltose/maltodextrin transporter ATP-binding protein	C metabolism, transport	YPK_RS01910	malK	maltose/maltodextrin ABC transporter ATP-binding protein MalK
YPK_0381	lamB	7.9	maltose/matodextrin outer membrane porine	C metabolism, transport	YPK_RS01915	lamB	maltoporin
YPK_0382	malM	2.7	maltose regulon periplasmic protein	C metabolism, transport	YPK_RS01920	malM	maltose operon protein MalM
YPK_0494	treC	2.1	trehalose(maltose) specific PTS system components IIBC	C metabolism, transport	YPK_RS02465	treC	alpha%2Calpha-phosphotrehalase
YPK_0495	treB	2.2	trehalose-6 phosphate hydrolase	C metabolism, transport	YPK_RS02470	treB	PTS trehalose transporter subunit IIBC
YPK_0586	ugpC	2	ABC transporter related	transport	YPK_RS02950	ugpC	ABC transporter ATP-binding protein
YPK_0692	cpbD-1	2.1	chitin-binding protein, contains fibronectin type III domain	metabolism	YPK_RS03485	YPK_RS03485	lytic polysaccharide monooxygenase
YPK_0693	chiC	2	glycoside hydrolase family protein, chitinase	metabolism	YPK_RS03490	YPK_RS03490	chitinase
YPK_0789		2.2	intradiol ring-cleavage dioxygenase	metabolism	YPK_RS03955	YPK_RS03955	intradiol ring-cleavage dioxygenase
YPK_1386	napD	2	assembly protein fpr periplasmic nitrate reductase	N metabolism	YPK_RS06970	napD	chaperone NapD
YPK_1575	idnK	2.3	gluconokinase	C metabolism, PPP	YPK_RS07950	YPK_RS07950	gluconokinase
YPK_1576	idnO	3	gluconate 5-dehydrogenase	C metabolism, PPP	YPK_RS07955	idnO	gluconate 5-dehydrogenase
YPK_1731	ydfZ	2.8	hypothetical protein		YPK_RS08725	ydfZ	putative selenium delivery protein YdfZ
YPK_1980	bioD	2.5	dethiobiotin synthase	vitamin/cofactor metabolism	YPK_RS09955	bioD	ATP-dependent dethiobiotin synthetase BioD
YPK_2072	adhE	2	acetaldehyde dehydrogenase/ alcohol dehydrogenase	C metabolism	YPK_RS10405	adhE	bifunctional acetaldehyde-CoA/alcohol dehydrogenase
YPK_2096	gapA	2.1	glyceraldehyde-3-phosphate dehydrogenase, glycolysis	C metabolism	YPK_RS10510	gapA	glyceraldehyde-3-phosphate dehydrogenase
YPK_2224	ompC2	2	porin	transport	YPK_RS11130	YPK_RS11130	porin
YPK_2576		2	ABC transporter-related	transport	YPK_RS12885	YPK_RS12885	darobactin export ABC transporter ATP-binding protein
YPK_2577	darE	2.3	radical SAM domain-containing	metabolism	YPK_RS12890	YPK_RS12890	darobactin maturation radical SAM/SPASM protein DarE
YPK_2603	acpP	3.6	putative acyl carrier protein	fatty acid metabolism	YPK_RS13015	YPK_RS13015	acyl carrier protein
YPK_2674	ansB	2	L-asparaginase II, asparagine -> aspartate	aa metabolism	YPK_RS13385	ansB	L-asparaginase 2
YPK_2739	sdaC	3.9	serine transporter	aa metabolism, transport	YPK_RS13705	YPK_RS13705	HAAAP family serine/threonine permease
YPK_3161	ybbN	2	putative thioredoxin	metabolism	YPK_RS15845	YPK_RS15845	co-chaperone YbbN
YPK_3215	ybaZ	3.3	methylated DNA-protein cysteine-methyltransferase	metabolism, transport	NA	NA	NA
YPK_3284	yafE	2.5	methyltransferase	metabolism	YPK_RS16470	YPK_RS16470	class I SAM-dependent methyltransferase
YPK_3285		2.1	hypothetical protein	metabolism	YPK_RS16475	YPK_RS16475	hypothetical protein
YPK_3293	cpbD-2	2.5	chitin-binding domain-containing domain	metabolism	YPK_RS16515	YPK_RS16515	lytic polysaccharide monooxygenase
YPK_3398		3	carbohydrate ABC transporter periplasmic protein	C metabolism, transport	YPK_RS17070	YPK_RS17070	substrate-binding domain-containing protein
YPK_3399		2	simple sugar transport system ATP-binding protein	C metabolism, transport	YPK_RS17075	YPK_RS17075	sugar ABC transporter ATP-binding protein
YPK_3402	sgbU	2.8	putative L-xylose 5-phosphate 3-epimerase	C metabolism, transport	YPK_RS17090	YPK_RS17090	L-ribulose-5-phosphate 3-epimerase
YPK_3403	sgbK	2.3	Hexulose-6-phosphate isomerase	C metabolism, transport	YPK_RS17095	YPK_RS17095	carbohydrate kinase
YPK_3710		2.3	alginate lyase family protein	metabolism	YPK_RS18650	YPK_RS18650	alginate lyase family protein
YPK_3894	metC	2.4	cystathionine beta-lyase, cysteine -> pyruvate homocysteine synthesis	S, N metabolism	YPK_RS19590	metC	cystathionine beta-lyase
YPK_3897	yedF	2.4	sulfurtransferase-like selenium metabolism protein YedF	metabolism	YPK_RS19605	yedF	sulfurtransferase-like selenium metabolism protein YedF
Transport and secretion, structural proteins
Downregulated loci (YmoA-activated)
YPK_0426	yjcD/pbuG	-2	Xanthine/uracil/vitamin C permease		YPK_RS02130	YPK_RS02130	NCS2 family permease
YPK_2048		-2	transport-associated, lipoprotein	transport	YPK_RS10300	YPK_RS10300	BON domain-containing protein
YPK_4237		-2	extracellular solute-binding protein family 3	transport	YPK_RS21390	YPK_RS21390	ABC transporter substrate-binding protein
Upregulated loci (YmoA-repressed)
YPK_0999	ompG	2	OmpG family monomeric porin	porin	YPK_RS05015	YPK_RS05015	OmpG family monomeric porin
YPK_1007	gspG	2.2	general secretion pathway protein G	protein export, secretion	YPK_RS05060	gspG	type II secretion system major pseudopilin GspG
YPK_1014	gspO	3.7	general secretion pathway protein O, prepilin peptidase	protein export, secretion	YPK_RS05095	YPK_RS05095	prepilin peptidase
Others
Downregulated loci (YmoA-activated)
-
Upregulated loci (YmoA-repressed)
pYV0039		4.2	putative transposase
pYV0090		3.2	putative transposase
pYV0091		4.2	putative transposase
pYV0092		6.4	putative transposase
pYV0093		4.6	putative transposase
YPK_1778		2	Spore coat U domain protein		YPK_RS08935	YPK_RS08935	spore coat U domain-containing protein
YPK_2291		2	transposase		NA	NA	NA
YPK_2385		2.2	transcriptional regulator, AraC family		YPK_RS11930	YPK_RS11930	helix-turn-helix transcriptional regulator
YPK_3824	fxsA	2	FxsA cytoplasmic membrane protein		YPK_RS19245	fxsA	membrane protein FxsA
Hypothetical proteins
Downregulated loci (YmoA-activated)
YPK_0631		-3.3	hypothetical protein		YPK_RS03185	YPK_RS03185	DUF3892 domain-containing protein
YPK_2018		-2.5	hypothetical protein		YPK_RS10140	YPK_RS10140	YbdD/YjiX family protein
YPK_2101		-2	hypothetical protein		NA	NA	NA
YPK_2282		-2	hypothetical protein		NA	NA	NA
YPK_2290		-2	hypothetical protein		NA	NA	NA
YPK_2441		-2	hypothetical protein		NA	NA	NA
YPK_2483		-2	hypothetical protein		NA	NA	NA
YPK_2723		-2	hypothetical protein		NA	NA	NA
YPK_3148		-2	hypothetical protein		NA	NA	NA
YPK_3218		-5	hypothetical protein		NA	NA	NA
YPK_3773		-2	hypothetical protein		YPK_RS18985	YPK_RS18985	DUF1107 domain-containing protein
YPK_3922		-2	hypothetical protein		YPK_RS19730	YPK_RS19730	DUF485 domain-containing protein
Upregulated loci (YmoA-repressed)
pYV0044		4.9	hypothetical protein
pYV0048		2.6	hypothetical protein
pYV0056		5.9	hypothetical protein
pYV0095		2.1	hypothetical protein
YPK_0044		2.1	hypothetical protein		YPK_RS00210	YPK_RS00210	hypothetical protein
YPK_0045		2.1	hypothetical protein		YPK_RS00215	YPK_RS00215	DUF4225 domain-containing protein
YPK_0064		2.1	hypothetical protein		YPK_RS00305	YPK_RS00305	DUF262 domain-containing protein
YPK_0154		2	hypothetical protein		YPK_RS00750	YPK_RS00750	DUF943 family protein
YPK_0252		2.7	hypothetical protein		YPK_RS21460	YPK_RS21460	hypothetical protein
YPK_0411		2.4	hypothetical protein		YPK_RS02060	YPK_RS02060	hypothetical protein
YPK_0612		2.8	hypothetical protein		YPK_RS03090	YPK_RS03090	hypothetical protein
YPK_0724		2.1	hypothetical protein		YPK_RS03640	YPK_RS03640	hypothetical protein
YPK_0767		3.9	hypothetical protein		YPK_RS03850	YPK_RS03850	hypothetical protein
YPK_0768		3.3	hypothetical protein		NA	NA	NA
YPK_0769		4.9	hypothetical protein		YPK_RS03860	YPK_RS03860	DUF4303 domain-containing protein
YPK_0771		3.5	hypothetical protein		YPK_RS03870	YPK_RS03870	hypothetical protein
YPK_0772		4.4	hypothetical protein		NA	NA	NA
YPK_0773		4.2	hypothetical protein		YPK_RS03880	YPK_RS03880	hypothetical protein
YPK_0775		4.5	hypothetical protein		YPK_RS03890	YPK_RS03890	HEAT repeat domain-containing protein
YPK_0776		4.1	hypothetical protein		YPK_RS21765	YPK_RS21765	hypothetical protein
YPK_0777		2.2	hypothetical protein		YPK_RS03900	YPK_RS03900	hypothetical protein
YPK_1017		2.6	hypothetical protein		NA	NA	NA
YPK_1451		4.1	hypothetical protein		YPK_RS07325	YPK_RS07325	DUF799 domain-containing protein
YPK_1574		2	hypothetic protein		YPK_RS07945	YPK_RS07945	YhcH/YjgK/YiaL family protein
YPK_2065		2.3	hypothetical protein		YPK_RS10370	YPK_RS10370	hypothetical protein
YPK_2200		2.5	hypothetical protein		NA	NA	NA
YPK_2405		2.5	hypothetical protein		NA	NA	NA
YPK_2406		2.8	hypothetical protein		YPK_RS12025	YPK_RS12025	hypothetical protein
YPK_2471		6.1	hypothetical protein		YPK_RS12350	YPK_RS12350	hypothetical protein
YPK_2573		2.2	hypothetical protein		YPK_RS12870	YPK_RS12870	peptide antibiotic darobactin C
YPK_2582		4.7	hypothetical protein		YPK_RS12915	YPK_RS12915	hypothetical protein
YPK_2604		2.3	hypothetical protein		YPK_RS13020	YPK_RS13020	lipocalin-like domain-containing protein
YPK_2781		2	hypothetical protein		YPK_RS22285	YPK_RS22285	hypothetical protein
YPK_2874		2.5	hypothetical protein		YPK_RS14380	YPK_RS14380	DUF1456 family protein
YPK_2888		2	hypothetical protein		YPK_RS14445	YPK_RS14445	DUF4097 domain-containing protein
YPK_2892		2.5	hypothetical protein		NA	NA	NA
YPK_2893		3.4	hypothetical protein		NA	NA	NA
YPK_2894		2.6	hypothetical protein		YPK_RS14480	YPK_RS14480	hypothetical protein
YPK_3061		4.8	hypothetical protein		YPK_RS15335	YPK_RS15335	hypothetical protein
YPK_3062		5.1	hypothetical protein		YPK_RS15340	YPK_RS15340	hypothetical protein
YPK_3212		5.7	hypothetical protein		YPK_RS16090	YPK_RS16090	hypothetical protein
YPK_3567		2.7	hypothetical protein		YPK_RS17925	YPK_RS17925	DUF2285 domain-containing protein
YPK_3576		3.2	hypothetical protein		YPK_RS17970	YPK_RS17970	DUF3757 domain-containing protein
YPK_3836		3	hypothetical protein		NA	NA	NA
YPK_3871		3	hypothetical protein		YPK_RS19475	YPK_RS19475	DUF1120 domain-containing protein
YPK_3982		2.1	hypothetical protein		YPK_RS20055	YPK_RS20055	DUF2500 domain-containing protein
YPK_3983		2.4	hypothetical protein		YPK_RS20060	YPK_RS20060	DUF1820 family protein
YPK_4107		2.6	hypothetical protein		YPK_RS20735	YPK_RS20735	DUF4232 domain-containing protein
YPK_4108		2.1	hypothetical protein		YPK_RS20745	YPK_RS20745	hypothetical protein
